# Supplementary material for: Information Asymmetries and Intra-Company Monitoring: an Empirical Analysis of Nonlinear Relationships Between Company Characteristics and the Size of the Internal Audit Function
Source: Springer Nature journal article supplement (doi:10.1007/s41471-021-00128-2), 2022-01-04
Supplement: MOESM1 [file 20002172]

**Online-Appendix: Used Survey Question for this Study**

| Variable | Content and categories | Original Survey Question from the IIA Survey |
| --- | --- | --- |
| *IAF_Size* | Total number of employees in the IAF, including administrative staff and supervisors | Please enter the number of internal audit employees:  (incl. administration and head)  _________ employees (FTE) |
| *Employ* | Total number of full-time equivalent employees | Please enter the total number of employees in your company/group: (if applicable incl. number of employees of outsourced companies/areas to be audited) Please state in full-time employee/FTE (Full Time Equivalent) format  ________ employees (FTE) |
| *AudObj* | Number of objects that should be covered by the IAF | How many objects are in your audit universe?  ___________________ |
| *Sub* | Number of subsidiaries | How many subsidiaries / legal entities (approx.) do belong to your company?  ________________ |
| *ForSales* | Percentage share of foreign sales in total sales | How much turnover does your company generate abroad? (in percent)  ________________ |
| *UnplAud* | Percentage share of unplanned audits in total audits | What is the proportion of unplanned audits in the audit activities of internal  audit? (in percent)  __________________ |
| *Assur* | Percentage share of working time for assurance tasks in total working time | How do you rate the relationship between audit and advisory services provided  by the internal audit department?  Audit (assurance) ___________%  Consulting__________ % (sum must be 100%) |
| *StakeIntens* | Total value that measures the intensity with which six different stakeholders use the IAF | How intensively are the audit results used from your point of view? Please select the appropriate answer for each item on a scale from very little (1) to very intense (5) for the following stakeholders:   - Supervisory Board/Board of Directors - Audit Committee/Audit Committee - Executive Board/Company Management - Chartered accountant - Regulators (financial service providers only) - Management of audited entities |
| *Industry* | Company’s industry (1) finance or insurance sectors, (0) all other industries | To which industry group does your company belong?  Please select only one of the following answers:   - Production - Trade - Service - Credit institutions/financial services - Insurances - Telecommunication/media - Pension and social insurances - Utility companies - Other |
| *Listing* | Company’s listing status (1) listed, (0) not listed | Your company is “Capital market-oriented”   - Yes - No |
| *AudPlanSig* | Signing of the company’s audit plan (2) Audit committee and supervisory board sign, (1) either audit committee or supervisory board signs, (0) neither audit committee nor supervisory board signs | Who approves the audit plan?  Please select all applicable answers:   - The audit plan is not explicitly approved. - Supervisory Board/Board of Directors - Audit Committee / Audit Committee - Board of Management / Management Board - Chairman of the Executive Board / Spokesman of the Executive Board / Head of - Public Institutions - Member of the Board of Management Internal Audit |
| *ACMeet* | Meetings between the CAE and the audit committee (1) CAE has private meetings with the audit committee, (0) CAE does not have any private meetings with the audit committee | Do you additionally meet with the ... in separate personal sessions?  Please select all applicable answers:   - Chairmen of the supervisory board - Audit Committee - Regulator - Responsible C-Level Member |
